# Supplementary material for: Preparation of novel nano-composite Ni(OH)2/USY material and its application for electrochemical capacitance storageElectronic supplementary information (ESI) available: calculation method of the measured and theoretical specific capacitance. See http://www.rsc.org/suppdata/cc/b4/b401922a/
Source: Royal Society of Chemistry journal article supplement (doi:10.1039/b401922a), 2004-01-01
Supplement: b401922a.pdf [file b401922a.pdf]

### Electronic Supplementary Information

The specific capacitance was measured by the chronopotentiometric measurement technique and calculated by  $I \times \Delta t / (\Delta V \times m)$ , where  $I$  is the constant discharging current,  $\Delta t$  is the discharging time that is measured from  $-0.1$  to  $0.50$  V,  $\Delta V$  is the potential drop at a constant discharge current of  $400$  mA/g, and  $m$  is the mass of the corresponding electrode materials measured.

Considering that single electron redox reactions are assumed to take place in all of the bulk material, the theoretical specific capacitance,  $C_t$ , was estimated according to the equation:  $C_t = n \times F / (\Delta V \times m)$ , where  $n$  is 1, the mole of charge transferred per mole of  $\text{Ni(OH)}_2$ ,  $F$  is Faraday's constant,  $m$  is the mole mass of electroactive phase  $\text{Ni(OH)}_2$ , and  $\Delta V$  is the potential sweep range from  $-0.10$  to  $0.50$  V in current measurement. A theoretical specific capacitance,  $C_t$ , of  $1735$  F/g could be obtained.
